# Supplementary material for: Technical note: Analytical protocols and performance for apatite and zircon (U–Th) ∕ He analysis on quadrupole and magnetic sector mass spectrometer systems between 2007 and 2020
Source: Copernicus journal article supplement (doi:10.5194/gchron-3-351-2021), 2021-06-01
Supplement: Supplementary file 1 [file gchron-3-351-2021-supplement.zip]

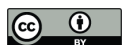

## *Supplement of*

# **Technical note: Analytical protocols and performance for apatite and zircon (U–Th) / He analysis on quadrupole and magnetic sector mass spectrometer systems between 2007 and 2020**

**Cécile Gautheron et al.**

*Correspondence to:* Cécile Gautheron ([cecile.gautheron@universite-paris-saclay.fr](mailto:cecile.gautheron@universite-paris-saclay.fr))

- [gchron-3-351-2021-supplement-title-page.pdf](#)
- [Ft-DES19\\_Alexis-Derycke\\_15juill2019.csv](#)
- [GeoSim\\_setup.exe](#)
- [HelpCreate\\_QtLFT.xlsm](#)
- [Supplementary information\\_Gautheronetal2021.docx](#)
- [TableS1\\_Data\\_DUR\\_VG\\_Quad-2021.xlsx](#)
- [TableS2\\_FCT\\_VG\\_He\\_line-2021.xlsx](#)

The copyright of individual parts of the supplement might differ from the article licence.
